# Supplementary material
Source: HighWire-hosted journal article supplement (https://erj.ersjournals.com/content/60/2/2102103)
Supplement: inline-supplementary-material-1 [file inline-supplementary-material-1.pdf]

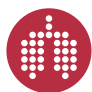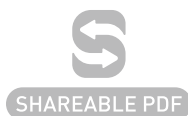

# Topical therapy with negative allosteric modulators of the calcium-sensing receptor (calcilytics) for the management of asthma: the beginning of a new era?

Daniela Riccardi<sup>1</sup>, Jeremy P.T. Ward <sup>2</sup>, Polina L. Yarova<sup>3</sup>, Luke J. Janssen<sup>4</sup>, Tak Hong Lee<sup>2,5</sup>, Sun Ying<sup>6</sup> and Chris J. Corrigan<sup>2</sup>

<sup>1</sup>Cardiff School of Biosciences, University of Cardiff, Cardiff, UK. <sup>2</sup>Faculty of Life Sciences and Medicine and Asthma UK Centre in Allergic Mechanisms of Asthma, King's College London, London, UK. <sup>3</sup>Translational and Clinical Research Institute, School of Medical Sciences, Newcastle University, Newcastle, UK. <sup>4</sup>Dept of Medicine, McMaster University, Hamilton, ON, Canada. <sup>5</sup>Hong Kong Sanatorium and Hospital, Hong Kong, China. <sup>6</sup>Dept of Immunology, School of Basic Medical Sciences, Capital Medical University, Beijing, China.

Corresponding author: Chris J. Corrigan ([chris.corrigan@kcl.ac.uk](mailto:chris.corrigan@kcl.ac.uk))

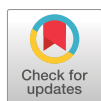

Shareable abstract (@ERSpublications)

**Negative allosteric modulators of the calcium-sensing receptor (calcilytics) delivered topically to the airways have the potential to revolutionise asthma therapy** <https://bit.ly/3tdSZkC>

**Cite this article as:** Riccardi D, Ward JPT, Yarova PL, *et al.* Topical therapy with negative allosteric modulators of the calcium-sensing receptor (calcilytics) for the management of asthma: the beginning of a new era? *Eur Respir J* 2022; 60: 2102103 [DOI: 10.1183/13993003.02103-2021].

This single-page version can be shared freely online.

Copyright ©The authors 2022. For reproduction rights and permissions contact [permissions@ersnet.org](mailto:permissions@ersnet.org)

Received: 19 April 2021  
Accepted: 16 Dec 2021

## Abstract

In this review article we present the evidence to date supporting the role of the calcium-sensing receptor (CaSR) as a key, pluripotential molecular trigger for asthma and speculate on the likely benefits of topical therapy of asthma with negative allosteric modulators of the CaSR: calcilytics.
